# Supplementary material for: Collagen/polyester-polyurethane porous scaffolds for use in meniscal repair
Source: Royal Society of Chemistry journal article supplement (doi:10.1039/d4bm00234b), 2024-01-01
Supplement: d4bm00234b1.pdf [file d4bm00234b1.pdf]

# Collagen / polyester-polyurethane porous scaffolds for use in meniscal repair

Gaëlle Savin <sup>a,b,d</sup>, Sylvain Caillol <sup>b</sup>, Audrey Bethry <sup>a</sup>, Eric Rondet <sup>c</sup>, Michel Assor <sup>d</sup>, Ghislain David <sup>b</sup>, Benjamin Nottelet <sup>a,e\*</sup>

<sup>a</sup> IBMM, Univ Montpellier, CNRS, ENSCM, Montpellier, France

gaelle.savin@enscm.fr (G.S.); audrey.bethry@umontpellier.fr (A.B.)

<sup>b</sup> ICGM, Univ Montpellier, CNRS, ENSCM, Montpellier, France

ghislain.david@enscm.fr (G.D.); sylvain.caillol@enscm.fr (S.C.)

<sup>c</sup> QualiSud, Université de Montpellier, Avignon Université, CIRAD, Institut Agro, IRD, Université de la Réunion, Montpellier France

eric.rondet@umontpellier.fr (E.R.)

<sup>d</sup> Arthrocart Biotech, Marseille, France

michel.assor@arthrocart.com (M.A.)

<sup>e</sup> Department of Pharmacy, Nîmes University Hospital, 30900, Nîmes, France

\*Corresponding authors: E-mail address: benjamin.nottelet@umontpellier.fr (B.N.)

## Supplementary material

|                                                                                                                                                                                                                                                                                                                    |    |
|--------------------------------------------------------------------------------------------------------------------------------------------------------------------------------------------------------------------------------------------------------------------------------------------------------------------|----|
| <b>Fig. S1.</b> 2D heteronuclear spectrum <sup>1</sup> H- <sup>1</sup> H g-edited COSY (600 MHz, CdCl <sub>3</sub> ) of PCL-LDI. ....                                                                                                                                                                              | 3  |
| <b>Fig. S2.</b> 2D heteronuclear spectra <sup>13</sup> C- <sup>1</sup> H g-edited HSQC (600 MHz, CdCl <sub>3</sub> ) of the prepolymer PCL-LDI. ....                                                                                                                                                               | 4  |
| <b>Fig. S3.</b> Thermograms of PLGA-diol, PCL-LDI and the resulting PEU.....                                                                                                                                                                                                                                       | 4  |
| <b>Fig. S4.</b> Typical pore size distribution of a PEU scaffold. ....                                                                                                                                                                                                                                             | 5  |
| <b>Fig. S5.</b> Typical stress/strain compression curve of HDI-based PEU scaffold.....                                                                                                                                                                                                                             | 5  |
| <b>Fig. S6.</b> Calibration curve of the hydroxyproline content. Linear fit: $y=0.1472x$ , $r^2=0.9996$ .....                                                                                                                                                                                                      | 6  |
| <b>Fig. S7.</b> Calibration curve of the Col-FITC content. Linear fit: $y=2.2022x$ , $r^2=0.9985$ . ....                                                                                                                                                                                                           | 7  |
| <b>Fig. S8.</b> Representative $\mu$ CT images of A) PEU scaffold, B) PEU-Col scaffold, C) PEU-Col scaffold with iohexol. Red line corresponds to the cross section showed in Fig 4. Scale bar corresponds to 2 mm. ....                                                                                           | 7  |
| <b>Fig. S9.</b> L929 proliferation on the different scaffolds after 2, 4, 9 and 14 days. The fibroblasts were seeded on TCPS (n=6), Actifit® gold standard (n=4), PEU scaffold (n=6) and PEU-Col scaffold (n=6), and cultured for 14 days. * Indicates a significant difference between groups (* $p<0.05$ ). .... | 8  |
| <b>Fig. S10.</b> Evaluation of scaffolds cell proliferation: L929 fibroblasts morphology observed under microscope .....                                                                                                                                                                                           | 9  |
| <b>Fig. S11.</b> pH evolution of the PBS degradation solutions containing Gold standard and PEU scaffolds samples. The solution was refreshed when pH decreased by 5 %. ....                                                                                                                                       | 10 |
| <b>Fig. S12.</b> Chromatogram of gold standard Actifit® (SEC MALS-THF). ....                                                                                                                                                                                                                                       | 10 |

|                                                                                                                 |   |
|-----------------------------------------------------------------------------------------------------------------|---|
| <b>Table S1.</b> IEW and HEW of the precursors of interest.....                                                 | 2 |
| <b>Table S2.</b> dn/dc values obtained for the polymers.....                                                    | 2 |
| <b>Table S3.</b> Raw data of the absorbance values and hydroxyproline extracted from the calibration curve..... | 6 |

**Table S1.** IEW and HEW of the precursors of interest.

| LDI                       | PCL-LDI              | PCL-diol                  | PLGA-diol              |
|---------------------------|----------------------|---------------------------|------------------------|
| IEW= $116.2 \pm 0.4$ g/eq | IEW= $1252 \pm$ g/eq | HEW= $1\ 112 \pm 16$ g/eq | HEW= $936 \pm 12$ g/eq |

**Table S2.** dn/dc values obtained for the polymers.

|                | PLGA 50            | PCL-LDI            | PEU                 |
|----------------|--------------------|--------------------|---------------------|
| dn/dc (ml/g)   | $0.044 \pm 0.0026$ | $0.079 \pm 0.0025$ | $0.0688 \pm 0.0043$ |
| R <sup>2</sup> | 0.9894             | 0.9957             | 0.9957              |

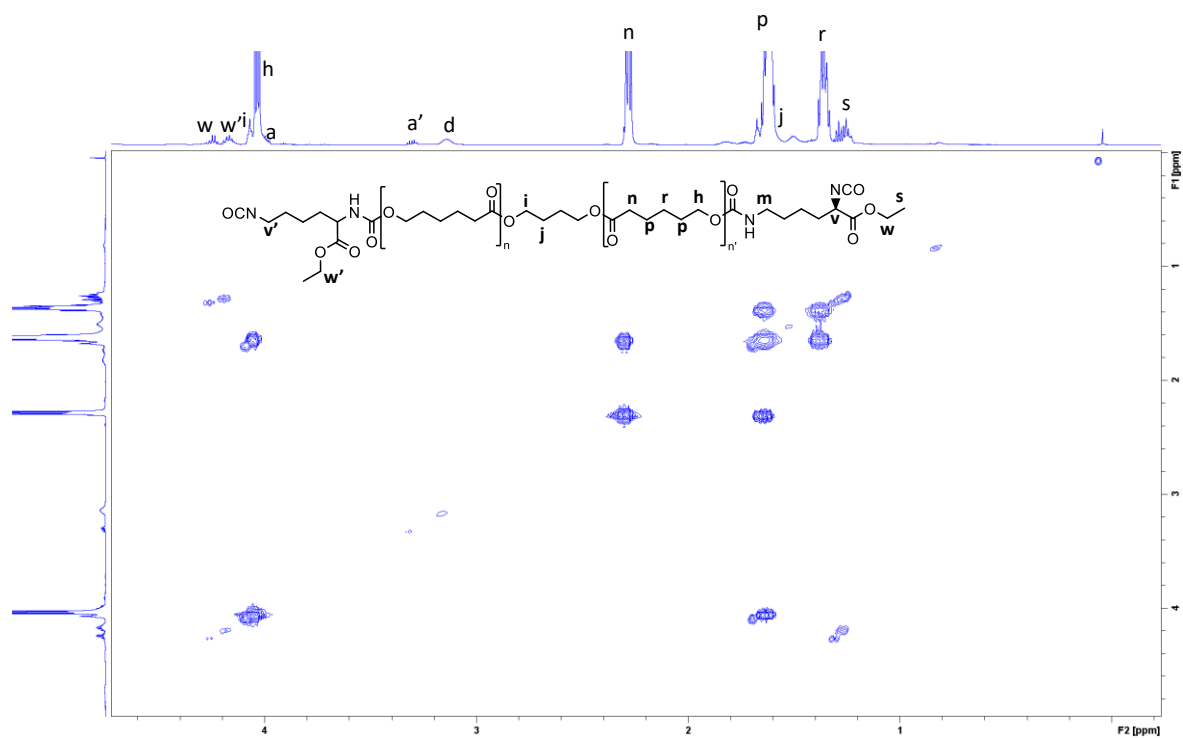

**Fig. S1.** 2D heteronuclear spectrum <sup>1</sup>H-<sup>1</sup>H g-edited COSY (600 MHz, CdCl<sub>3</sub>) of PCL-LDI.

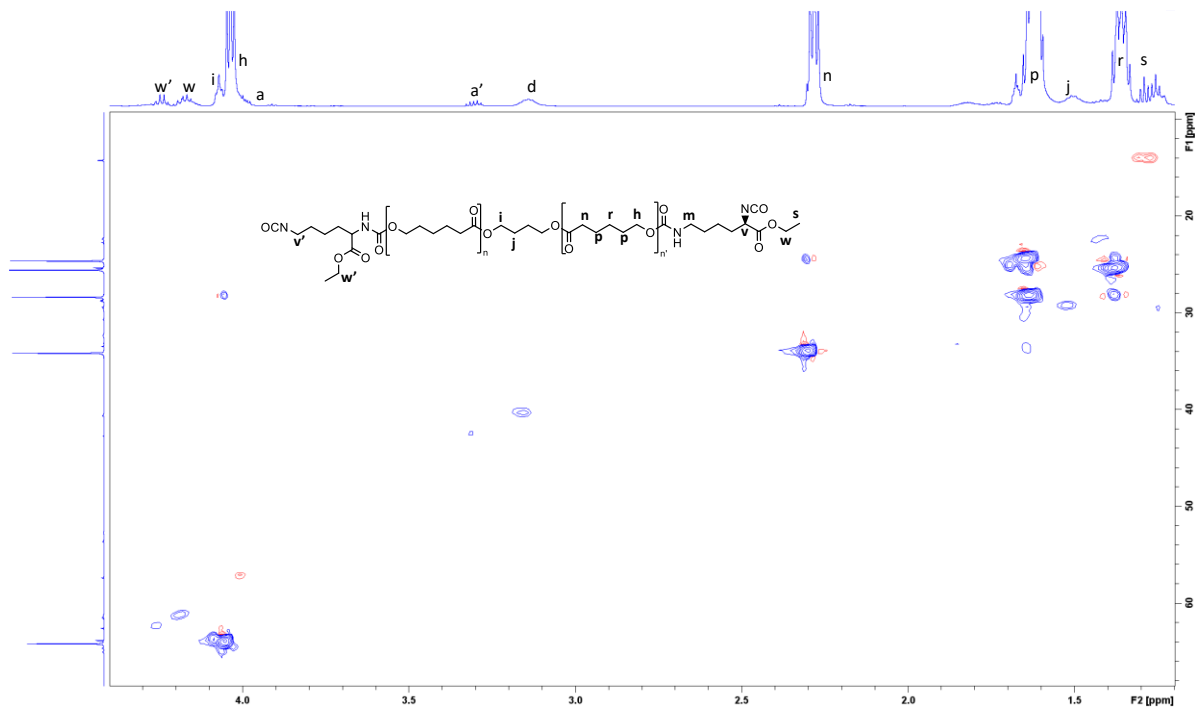

**Fig. S2.** 2D heteronuclear spectra  $^{13}\text{C}$ - $^1\text{H}$  g-edited HSQC (600 MHz,  $\text{CdCl}_3$ ) of the prepolymer PCL-LDI.

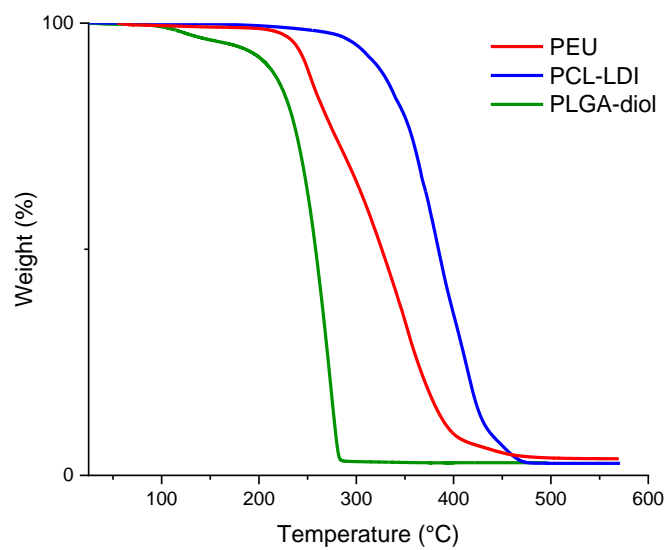

**Fig. S3.** Thermograms of PLGA-diol, PCL-LDI and the resulting PEU.

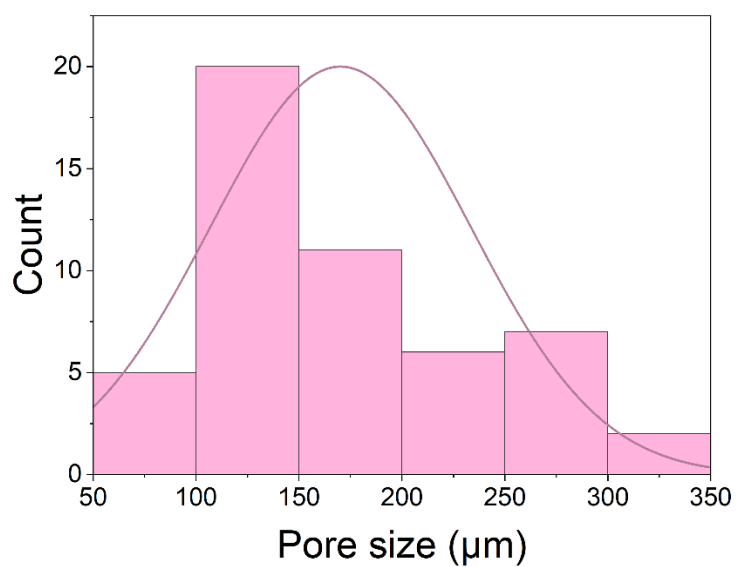

**Fig. S4.** Typical pore size distribution of a PEU scaffold.

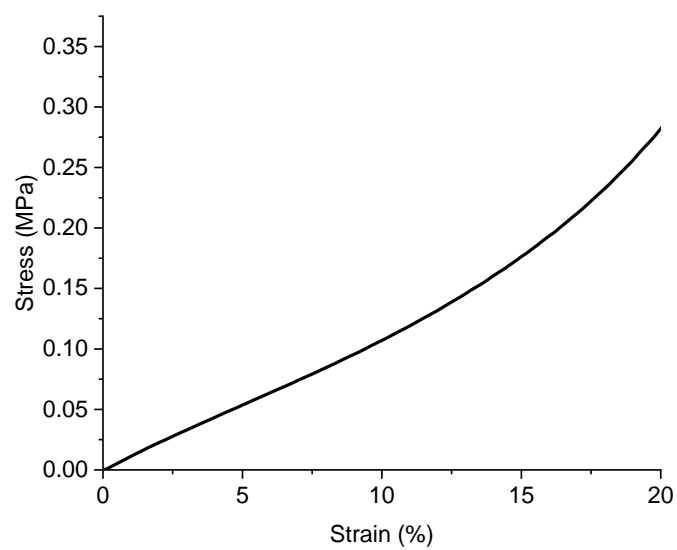

**Fig. S5.** Typical stress/strain compression curve of HDI-based PEU scaffold.

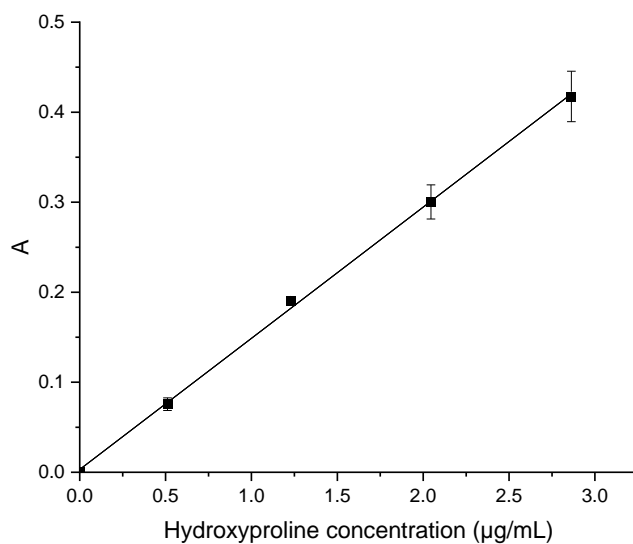

**Fig. S6.** Calibration curve of the hydroxyproline content. Linear fit:  $y=0.1472x$ ,  $r^2=0.9996$ .

**Table S3.** Raw data of the absorbance values and hydroxyproline extracted from the calibration curve.

| Sample dilution | Absorbance | Hydroxyproline concentration (µg/mL) | Hydroxyproline mass (µg) | Collagen mass (µg) | Average collagen mass (mg) |
|-----------------|------------|--------------------------------------|--------------------------|--------------------|----------------------------|
| 1/1             | 1.422      | 12.5                                 | 31.2                     | 237.4              | 0.262 ± 0.026              |
| 1/2             | 0.737      | 6.48                                 | 32.4                     | 246.2              |                            |
| 1/10            | 0.154      | 1.35                                 | 33.8                     | 256.8              |                            |

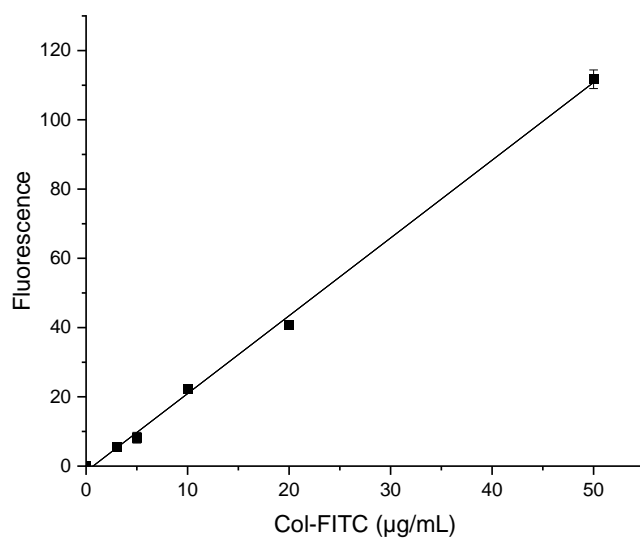

**Fig. S7.** Calibration curve of the Col-FITC content. Linear fit:  $y=2.2022x$ ,  $r^2=0.9985$ .

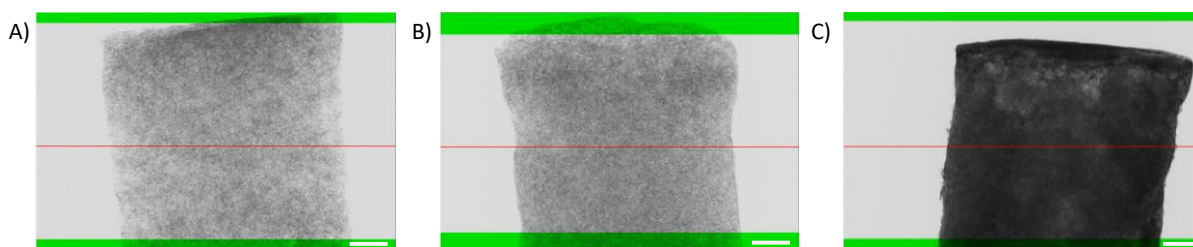

**Fig. S8.** Representative  $\mu$ CT images of A) PEU scaffold, B) PEU-Col scaffold, C) PEU-Col scaffold with iohexol. Red line corresponds to the cross section showed in Fig 4. Scale bar corresponds to 2 mm.

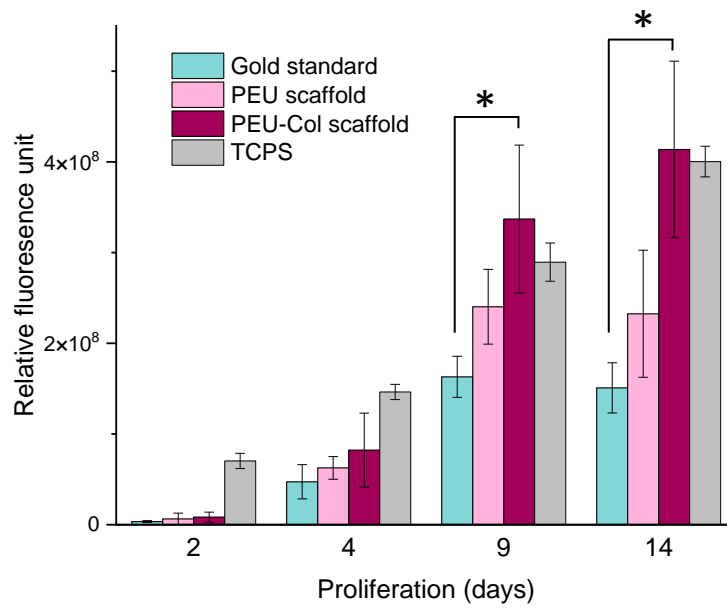

**Fig. S9.** L929 proliferation on the different scaffolds after 2, 4, 9 and 14 days. The fibroblasts were seeded on TCPS (n=6), Actifit® gold standard (n=4), PEU scaffold (n=6) and PEU-Col scaffold (n=6), and cultured for 14 days. \* Indicates a significant difference between groups (\*p<0.05).



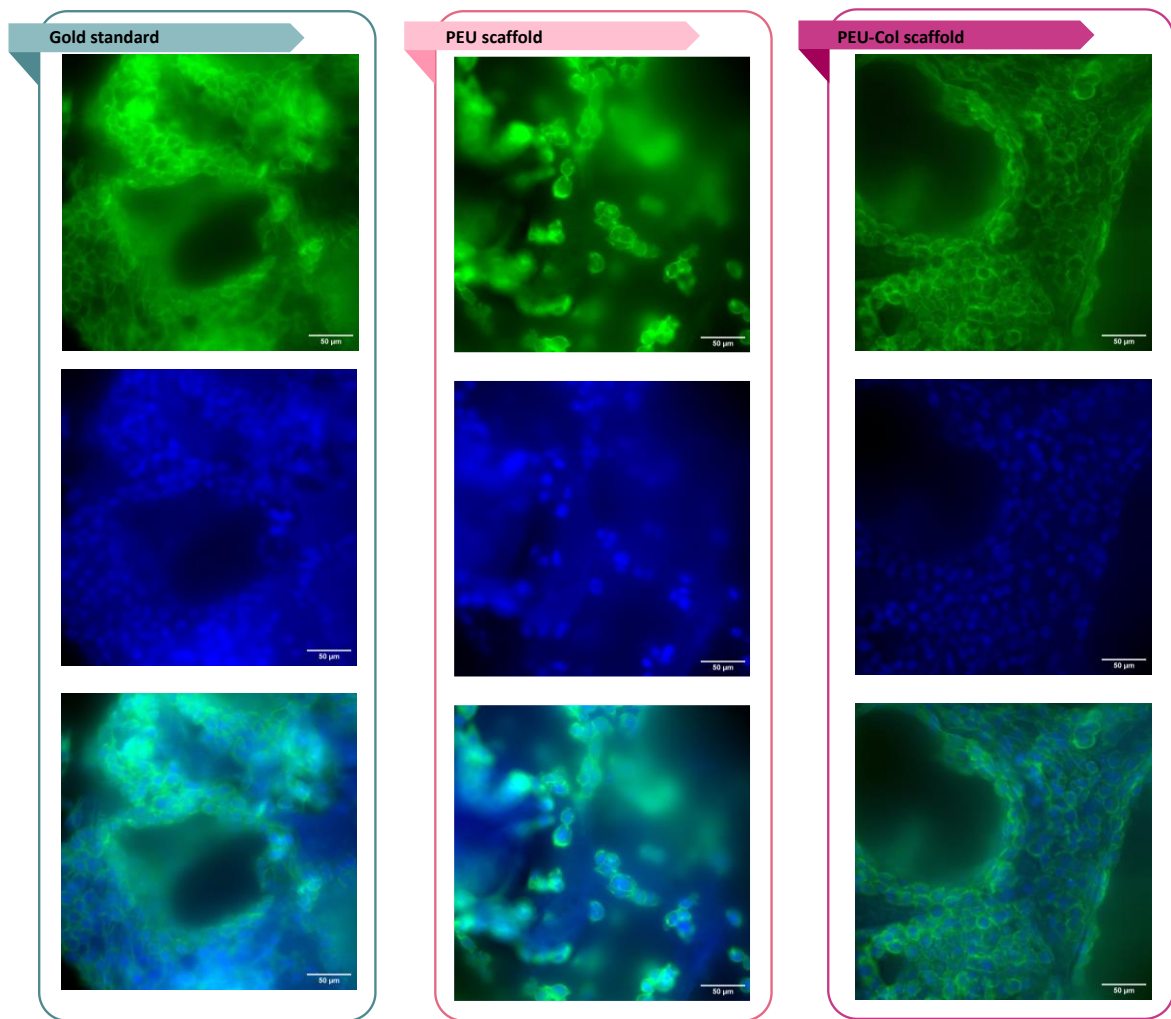

**Fig. S10.** Visualization of L929 fibroblasts on scaffolds. L929 fibroblasts morphology was observed using phalloidin iFluor 488 (F-actin stained in green) and Hoechst (nucleus in blue) with a Leica Thunder microscope. Scale bars correspond to 50 μm.

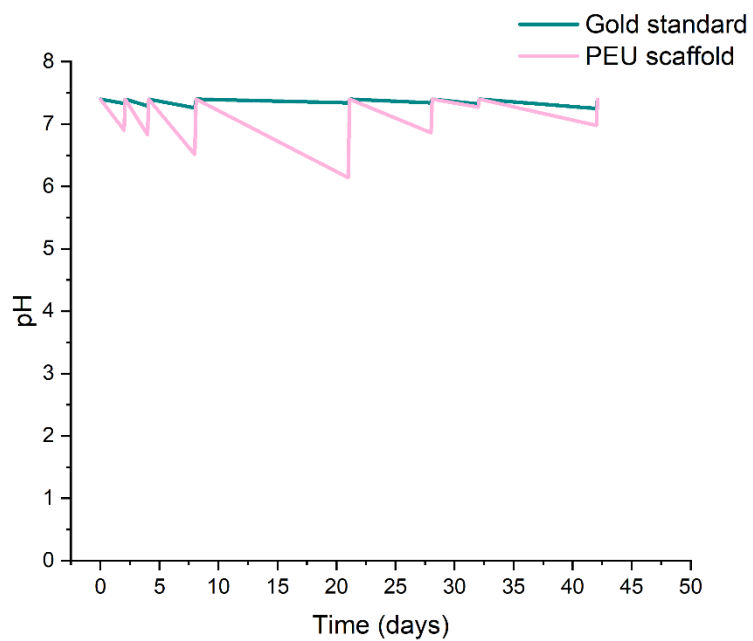

**Fig. S11.** pH evolution of the PBS degradation solutions containing Gold standard and PEU scaffolds samples. The solution was refreshed when pH decreased by 5 %.

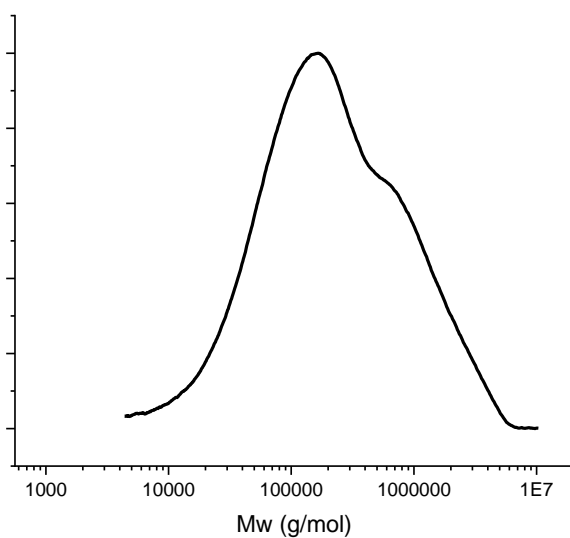

**Fig. S12.** Chromatogram of gold standard Actifit® (SEC MALS-THF).
